# Supplementary material
Source: PubMed Central journal article supplement (PMC7879311)
Supplement: dib-0005-0009-s02.pdf [file dib-0005-0009-s02.pdf]

# Biomarcadores digitales para la detección de deterioro cognitivo

El propósito de esta encuesta es obtener su opinión acerca del uso de herramientas tecnológicas para la detección temprana de enfermedades que afectan la memoria.

- 
- 1) ¿Es usted mayor de 21 años? ☐ Si ☐ No
- 
- 2) ¿Vive usted en Costa Rica? ☐ Si ☐ No
- 
- 3) Usted ha sido invitado a participar en una investigación. El propósito de este estudio es conocer su opinión acerca del uso de marcadores digitales para el diagnóstico temprano de enfermedades que pueden afectar la memoria. Su participación en este estudio es voluntaria. La encuesta tarda aproximadamente 15 minutos. No anticipamos ningún efecto adverso. Si experimentara alguno por favor contacte a la Dra. Sylvia Josephy al correo electrónico [sylvia.josephy@umassmemorial.org](mailto:sylvia.josephy@umassmemorial.org). Con esta investigación esperamos expandir nuestro conocimiento acerca de la opinión popular en torno a los biomarcadores digitales para el diagnóstico de enfermedades cognitivas. Su información se mantendrá confidencial, y no hay ninguna manera de rastrear sus respuestas. No ofrecemos ninguna remuneración por participar en este estudio.

No tenemos ningún conflicto de interés.

¿Cómo puedo obtener los resultados de esta investigación? Esperamos publicar los resultados en el próximo año.

Esta investigación es supervisada por el Institutional Review Board de la Universidad de Massachusetts. El Institutional Review Board es un grupo de personas que verifican que las investigaciones se realicen acorde a los estándares de la universidad. Si quisiera contactarlos, puede hacerlo al (508) 856-4261 (EEUU) o al correo electrónico [irb@umassmed.edu](mailto:irb@umassmed.edu).

☐ Está de acuerdo ☐ No está de acuerdo

**Definiciones y explicaciones básicas:**

**a. Deterioro cognitivo leve: problemas con la memoria que no interfieren con la independencia de una persona.**

**b. Demencia: problemas con la memoria que sí limitan la independencia de una persona.**

**c. Muchos de los cambios que suceden en las personas con demencia, ocurren antes de que los síntomas se manifiesten. Por eso es de suma importancia encontrar técnicas que detecten estos cambios de manera temprana y encontrar tratamientos que prevengan que la enfermedad progrese.**

**d. Biomarcadores digitales: tecnología que puede monitorear el comportamiento con el fin de detectar cambios que podrían deberse a una enfermedad; tales como aplicaciones en celulares inteligentes.**

## Características demográficas

|                                                                                                                                 |                       |                       |                              |                       |
|---------------------------------------------------------------------------------------------------------------------------------|-----------------------|-----------------------|------------------------------|-----------------------|
| 4) Edad (años)                                                                                                                  | <hr/>                 |                       |                              |                       |
| 5) Género                                                                                                                       | <input type="radio"/> | Femenino              | <input type="radio"/>        | Masculino             |
|                                                                                                                                 | <input type="radio"/> | Otro                  | <input type="radio"/>        | Prefiere no responder |
| 6) Grado de escolaridad                                                                                                         | <input type="radio"/> | Primaria              | <input type="radio"/>        | Secundaria            |
|                                                                                                                                 | <input type="radio"/> | Universitaria         | <input type="radio"/>        | Post-grado            |
| 7) ¿Es usted un(a) profesional en el área de la salud?                                                                          | <input type="radio"/> | Si                    | <input type="radio"/>        | No                    |
| 8) ¿Ha sido diagnosticado con alguna enfermedad que afecta la memoria?                                                          | <input type="radio"/> | Si                    | <input type="radio"/>        | No                    |
| 9) ¿Alguno de sus familiares ha sido diagnosticado con una enfermedad que afecta la memoria?                                    | <input type="radio"/> | Si                    | <input type="radio"/>        | No                    |
|                                                                                                                                 | <input type="radio"/> | Prefiere no contestar |                              |                       |
| 10) ¿Tiene usted un teléfono celular inteligente (por ejemplo un iPhone)?                                                       | <input type="radio"/> | Si                    | <input type="radio"/>        | No                    |
| 11) En una escala del 1 al 5, 5 siendo un experto, ¿Qué tan experto es usted en términos de tecnología?                         | <input type="radio"/> | 1                     | <input type="radio"/>        | 2                     |
|                                                                                                                                 | <input type="radio"/> | 3                     | <input type="radio"/>        | 4                     |
|                                                                                                                                 | <input type="radio"/> | 5                     | (5 corresponde a experto)    |                       |
| 12) En una escala del 1 al 5, 5 siendo que está completamente de acuerdo: ¿Recuerda las cosas tan fácilmente como hace 10 años? | <input type="radio"/> | 1                     | <input type="radio"/>        | 2                     |
|                                                                                                                                 | <input type="radio"/> | 3                     | <input type="radio"/>        | 4                     |
|                                                                                                                                 | <input type="radio"/> | 5                     | (5 corresponde a de acuerdo) |                       |

**Si le fuera recomendado por su médico, estaría dispuesto a tener una aplicación en su celular que monitorea sus mensajes de texto y correos electrónicos, específicamente (Escala del 1 al 5, 5 siendo que está completamente de acuerdo):**

|                                                     | 1                     | 2                     | 3                     | 4                     | 5                     |
|-----------------------------------------------------|-----------------------|-----------------------|-----------------------|-----------------------|-----------------------|
| 13) Qué tan largas son sus oraciones y sus párrafos | <input type="radio"/> |
| 14) Errores de ortografía                           | <input type="radio"/> |
| 15) Con cuánta precisión oprime cada tecla          | <input type="radio"/> |

- 16) A sabiendas de que en este momento no hay ningún tratamiento efectivo ni cura contra la demencia, ¿estaría dispuesto a tener una aplicación en su celular que monitorea su comportamiento y podría detectar cambios que alerten sobre un potencial diagnóstico de demencia? (Escala del 1 al 5, 5 siendo que está completamente de acuerdo)

☐ 1   ☐ 2   ☐ 3   ☐ 4  
☐ 5  
(5 corresponde a de acuerdo)

**Por favor indique en una escala del 1 al 5 (5 siendo lo más preocupante), ¿cuáles de los siguientes factores podrían afectar su decisión?**

|                                                  | 1                     | 2                     | 3                     | 4                     | 5                     |
|--------------------------------------------------|-----------------------|-----------------------|-----------------------|-----------------------|-----------------------|
| 17) Privacidad                                   | <input type="radio"/> |
| 18) Ansiedad en torno a un potencial diagnóstico | <input type="radio"/> |
| 19) Impacto en su seguro de salud                | <input type="radio"/> |
| 20) Impacto en su seguro de vida                 | <input type="radio"/> |
| 21) Impacto financiero                           | <input type="radio"/> |

22) Otro:

---
